# Supplementary material
Source: publisher site journal article supplement (https://thieme-connect.com/media/endoscopy/202403/supmat/10-1055-a-2184-1609_22218049.pdf_suppl.pdf.pdf)
Supplement: Supplementary file 1 [file 10-1055-a-2184-1609_22218049.pdf_suppl.pdf.pdf]

## Supplementary material

## Cronin et al. Geometry of cold snare polypectomy

**Table 1s: Literature search for residual or incomplete adenoma resection for piecemeal Cold Snare Polypectomy.**

| Publication                               | Size (mm)                | pCSP (n) | IRR % (n) | RRA % (n)    |
|-------------------------------------------|--------------------------|----------|-----------|--------------|
| Ma X, Clin Gastro Hep 2022[1]             | -                        | 5        | 20.0 (1)  | -            |
| Kimoto Y, Clin Gastro Hep 2022[2]         | 23<br>(range 18-40)      | 106      | 0.0 (0)   | -            |
| McWhinney CD, Gastrointest Endosc 2021[3] | 17.2 mean<br>(6.5 SD)    | 225      | -         | 8.0 (18)     |
| Suresh S, EIO 2021[4]                     | 29.4<br>(range 20-80)    | 310      | -         | 34.8 (108)   |
| Augusto Barros, R EIO 2021[5]             | 13.7 mean<br>(5.2 SD)    | 293      | -         | 7.8 (23)**   |
| Li D, Scand J Gastro 2020[6]              | -                        | 176      | -         | 31.3 (55)*** |
| van Hattem A, Gut 2020[7]                 | 25<br>(IQR 20-30)        | 92       | -         | 4.3 (4)      |
| Mangira D, Gastrointest Endosc 2020[8]    | 20<br>(IQR 20-30)        | 164      | -         | 5.5 (9)      |
| Van Overbeke L, AGEB 2019[9]              | -                        | 87       | -         | 10.3 (9)**** |
| Tate DJ, Endoscopy 2018[10]               | 15.0<br>(IQR 14.5-20)    | 15       | -         | 0.0 (0)      |
| Tutticci NJ, Gastrointest Endosc 2018[11] | 17.5 mean<br>15.0 median | 163      | 1.2 (2)   | -            |
| Tutticci NJ, Gastrointest Endosc 2018[11] | 17.5 mean<br>15.0 median | 134      | -         | 0.6 (1)      |
| Rameshshanker R, Endoscopy 2018[12]       | 15.7 mean                | 29       | -         | 3.4 (1)      |
| Piraka C, EIO 2017[13]                    | 20.0<br>(range 12-60)    | 72       | -         | 9.7 (7)      |
| Muniraj T, Gastro Res Prac 2015[14]       | 19.0<br>(8.8 SD)         | 30       | -         | 20.0 (6)     |

## Supplementary material

Literature search terms: "cold snare" AND polypectomy AND incomplete; "cold snare" AND polypectomy AND residual.

Size, mean diameter of lesions removed via pCSP; pCSP, piecemeal Cold Snare Polypectomy; IRR, Incomplete Resection Rate, measured according to biopsies of edges taken at the time of resection; RRA, Residual or Recurrent Adenoma rate, measured at first surveillance colonoscopy.

1. Ma X, Feng X, Li Y, Du Y, Wang J, Wu Y, et al. A Comparison of Incomplete Resection Rate of Large and Small Colorectal Polyps by Cold Snare Polypectomy. *Clin Gastroenterol Hepatol.* 2022;20(5):1163-70.
2. Kimoto Y, Sakai E, Inamoto R, Kurebayashi M, Takayanagi S, Hirata T, et al. Safety and Efficacy of Cold Snare Polypectomy Without Submucosal Injection for Large Sessile Serrated Lesions: A Prospective Study. *Clin Gastroenterol Hepatol.* 2022;20(2):e132-e8.
3. McWhinney CD, Vemulapalli KC, El Rahyel A, Abdullah N, Rex DK. Adverse events and residual lesion rate after cold endoscopic mucosal resection of serrated lesions  $\geq 10$  mm. *Gastrointest Endosc.* 2021;93(3):654-9.
4. Suresh S, Zhang J, Ahmed A, Abu Ghanimeh M, Elbanna A, Kaur R, et al. Risk factors associated with adenoma recurrence following cold snare endoscopic mucosal resection of polyps  $\geq 20$  mm: a retrospective chart review. *Endosc Int Open.* 2021;9(6):E867-e73.
5. Barros RA, Monteverde MJ, Dumonceau JM, Barros AS, Rainero GL, Barros RF, et al. Cold snare polypectomy without submucosal injection: safety and efficacy in 615 large serrated lesions. *Endosc Int Open.* 2021;9(9):E1421-e6.
6. Li D, Wang W, Xie J, Liu G, Wang R, Jiang C, et al. Efficacy and safety of three different endoscopic methods in treatment of 6-20 mm colorectal polyps. *Scand J Gastroenterol.* 2020;55(3):362-70.
7. van Hattem WA, Shahidi N, Vosko S, Hartley I, Britto K, Sidhu M, et al. Piecemeal cold snare polypectomy versus conventional endoscopic mucosal resection for large sessile serrated lesions: a retrospective comparison across two successive periods. *Gut.* 2021;70(9):1691-7.
8. Mangira D, Cameron K, Simons K, Zanati S, LaNauze R, Raftopoulos S, et al. Cold snare piecemeal EMR of large sessile colonic polyps  $\geq 20$  mm (with video). *Gastrointest Endosc.* 2020;91(6):1343-52.
9. Van Overbeke L, Ilegems S, Mertens G, Mortier L, van Dongen J, Verbeke L, et al. Cold snare endoscopic resection of nonpedunculated colorectal polyps larger than 10 mm. A retrospective series. *Acta Gastroenterol Belg.* 2019;82(4):475-8.
10. Tate DJ, Awadie H, Bahin FF, Desomer L, Lee R, Heitman SJ, et al. Wide-field piecemeal cold snare polypectomy of large sessile serrated polyps without a submucosal injection is safe. *Endoscopy.* 2018;50(3):248-52.

## Supplementary material

11. Tutticci NJ, Hewett DG. Cold EMR of large sessile serrated polyps at colonoscopy (with video). *Gastrointest Endosc*. 2018;87(3):837-42.
12. Rameshshanker R, Tsiamoulos Z, Latchford A, Moorghen M, Saunders BP. Resection of large sessile serrated polyps by cold piecemeal endoscopic mucosal resection: Serrated Cold Piecemeal Endoscopic mucosal resection (SCOPE). *Endoscopy*. 2018;50(7):E165-e7.
13. Piraka C, Saeed A, Waljee AK, Pillai A, Stidham R, Elmunzer BJ. Cold snare polypectomy for non-pedunculated colon polyps greater than 1 cm. *Endosc Int Open*. 2017;5(3):E184-e9.
14. Muniraj T, Sahakian A, Ciarleglio MM, Deng Y, Aslanian HR. Cold snare polypectomy for large sessile colonic polyps: a single-center experience. *Gastroenterol Res Pract*. 2015;2015:175959.
